# Supplementary material for: Systematic Functional Annotation Workflow for Insects
Source: MDPI journal article supplement (doi:10.3390/insects13070586), 2022-06-27
Supplement: s1 [file s1]

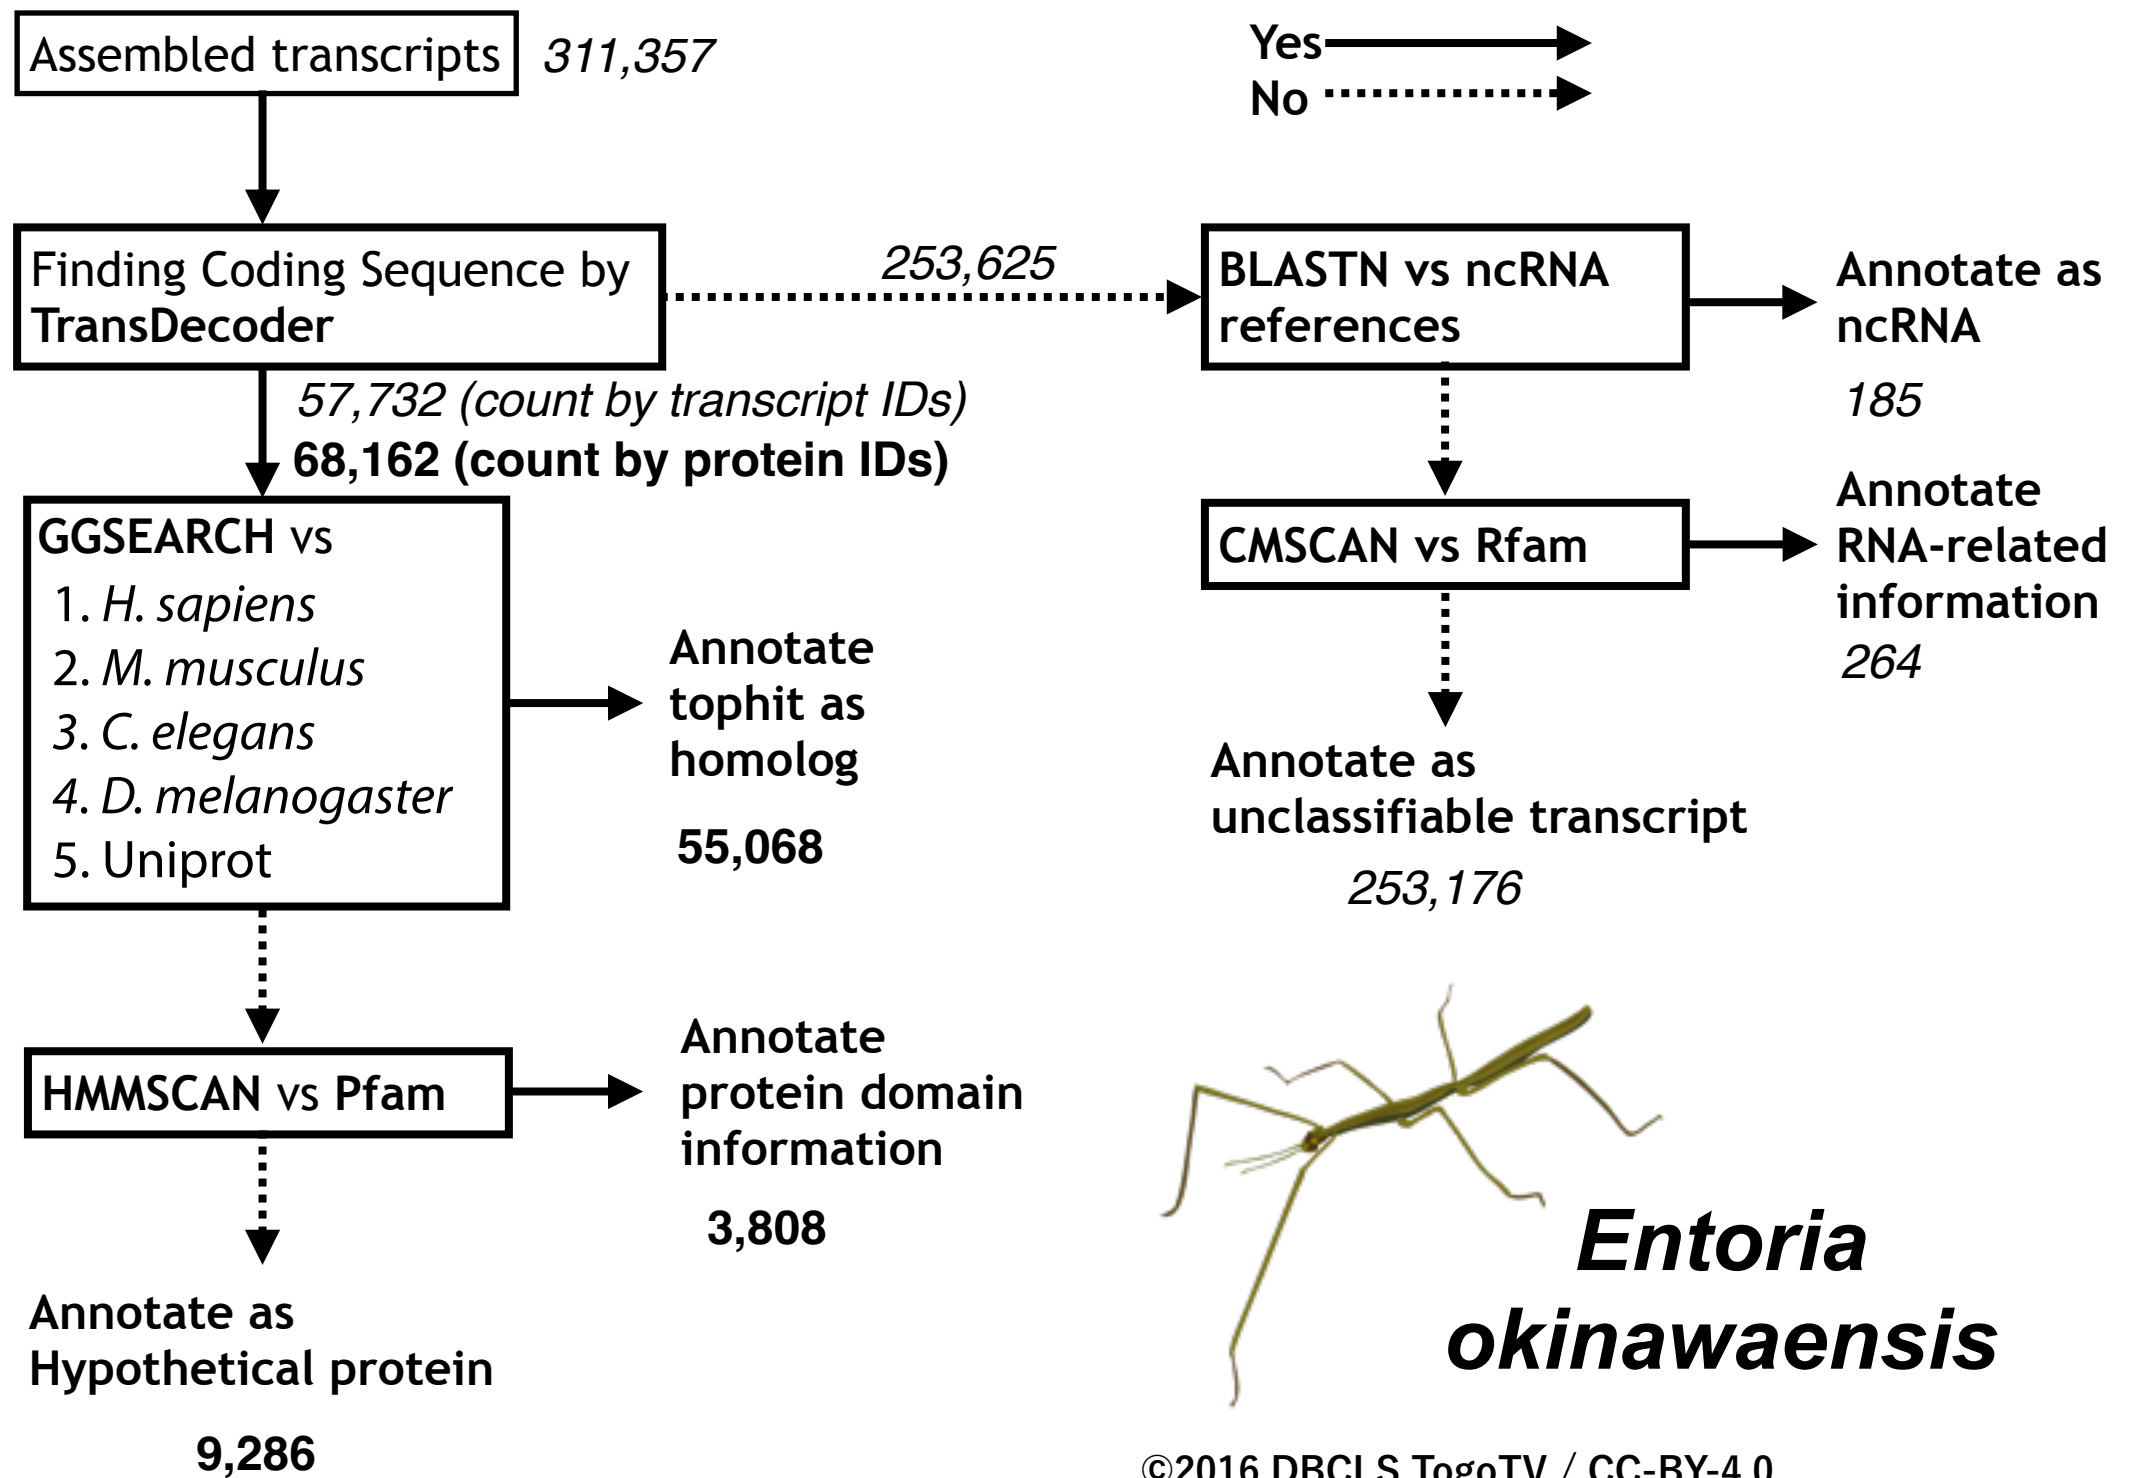

**Figure S1**

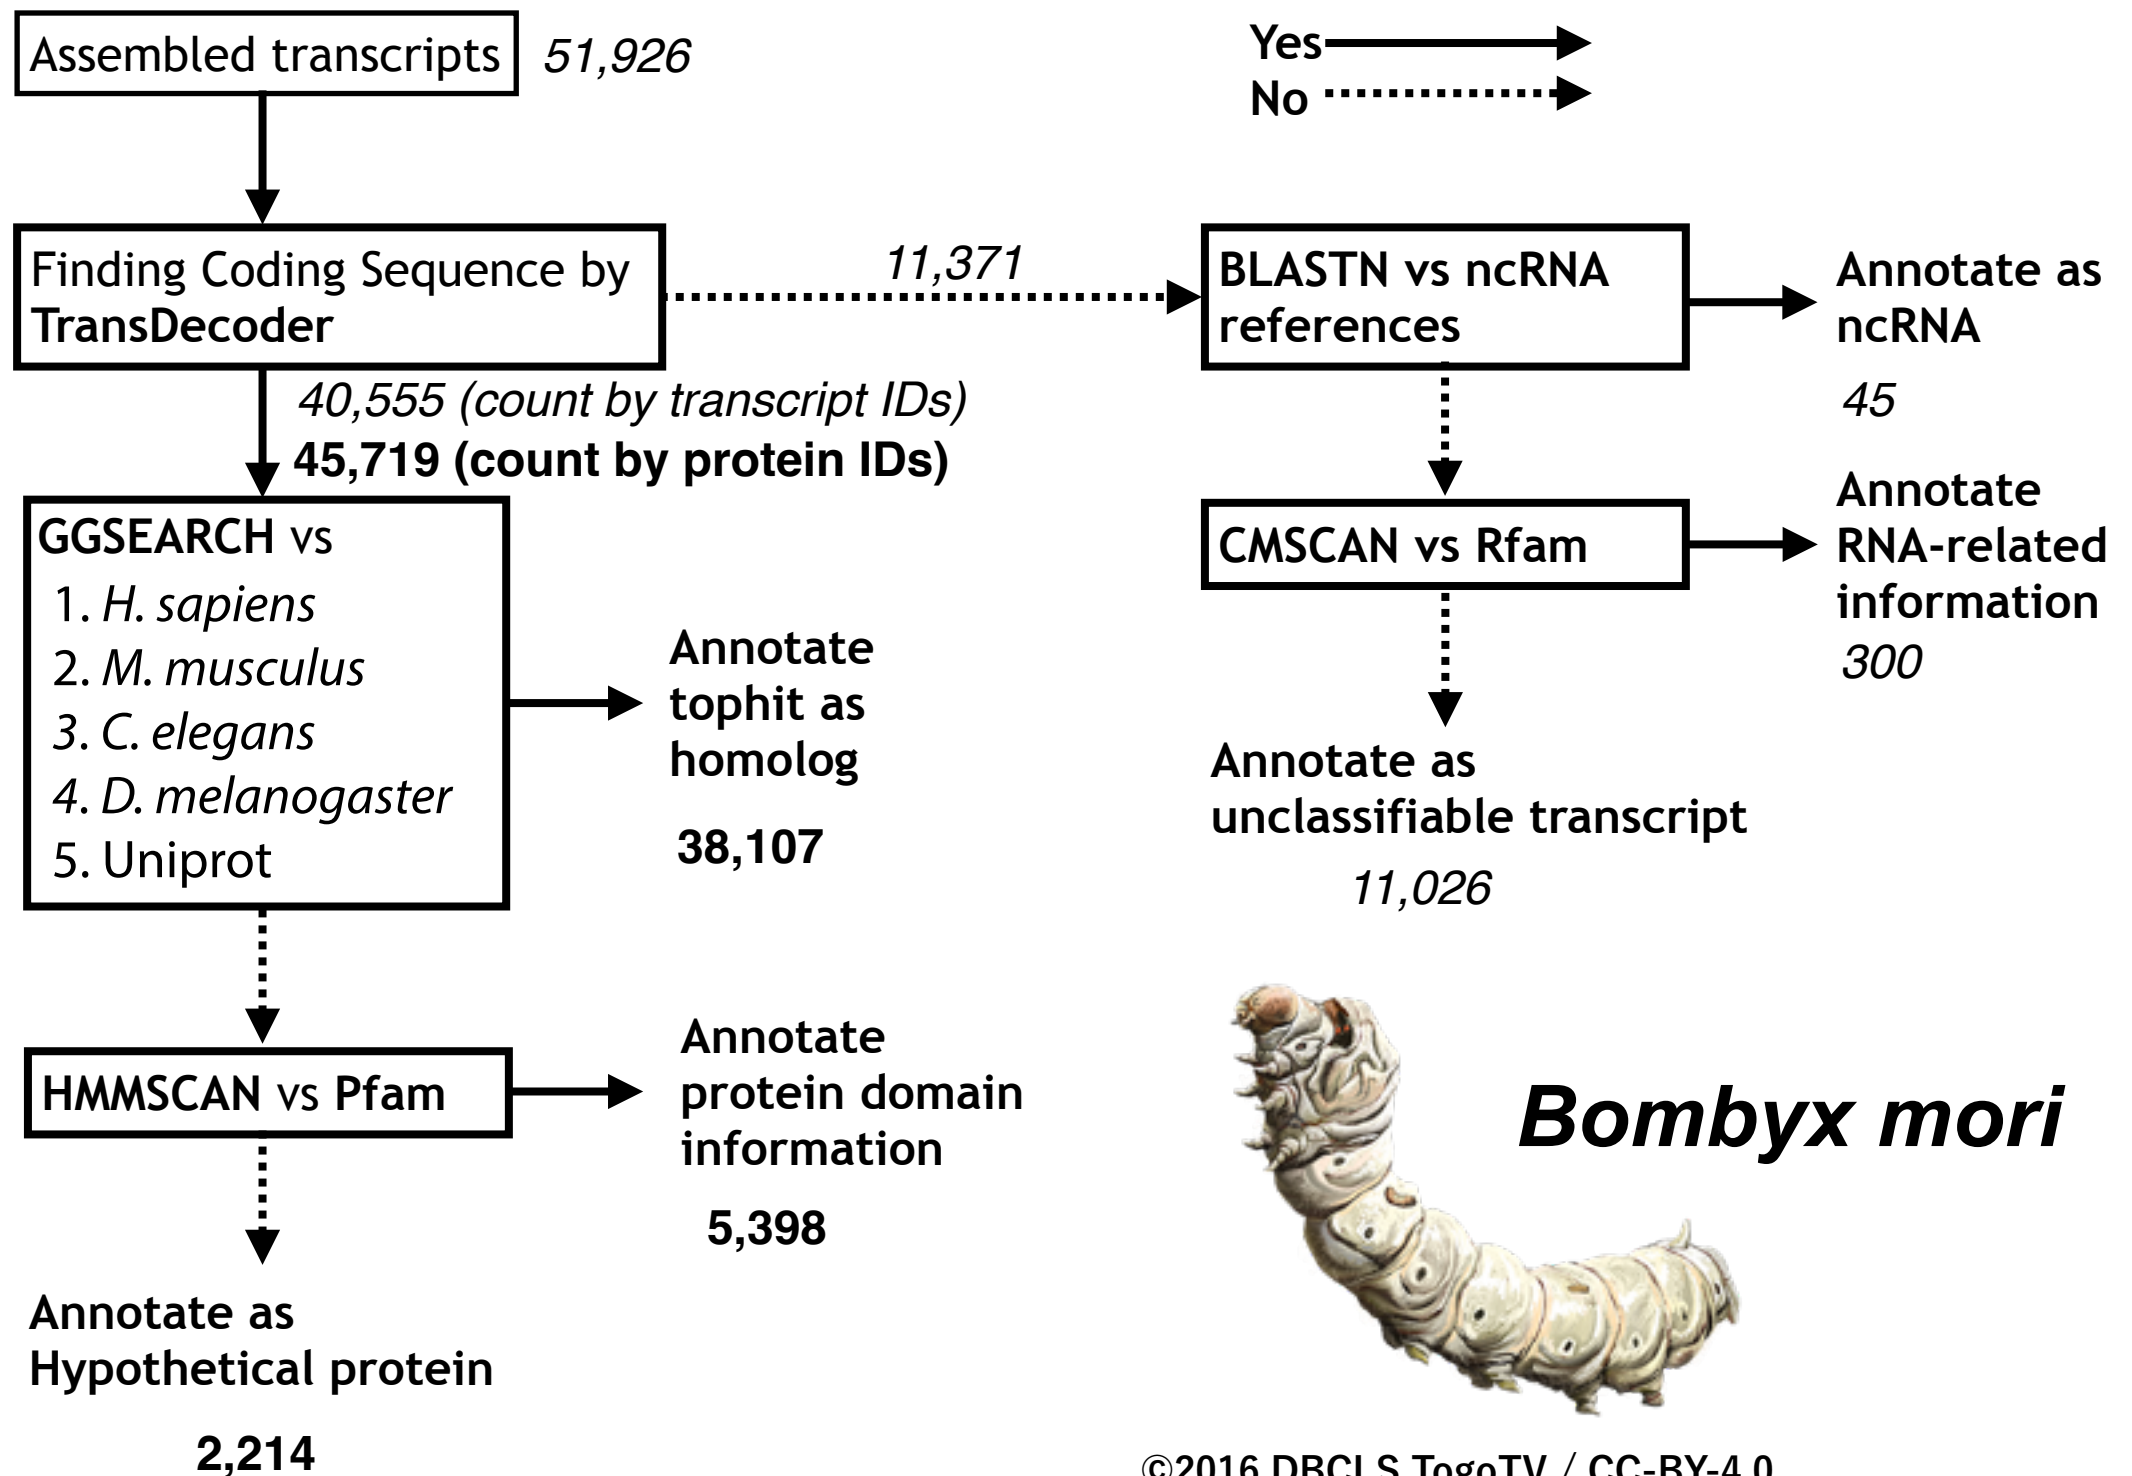

**Figure S2**
